# Supplementary material for: Application of the polyacrylonitrile fiber as a support for the green heterogeneous base catalyst and supported phase-transfer catalyst
Source: Royal Society of Chemistry journal article supplement (doi:10.1039/c4ra12069h), 2014-01-01
Supplement: c4ra12069h1.pdf [file c4ra12069h1.pdf]

## Supporting Information

# Application of Polyacrylonitrile Fiber as Support for Green Heterogeneous Base and Supported Phase- transfer Catalysts

Xian-Lei Shi,\* Minli Tao, Huikun Lin and Wenqin Zhang\*

*Department of Chemistry, Tianjin University, Collaborative Innovation Center of  
Chemical Science and Engineering (Tianjin), and Tianjin Key Laboratory of Applied  
Catalysis Science and Technology, Tianjin 300072, China*

*E-mail: [shixl@tju.edu.cn](mailto:shixl@tju.edu.cn) or [zhangwenqin@tju.edu.cn](mailto:zhangwenqin@tju.edu.cn); Fax: +86-22-27403475*

### List of Contents:

|                                                                 |        |
|-----------------------------------------------------------------|--------|
| The Acid Exchange Capacity of PANF-PA                           | S2     |
| Scaleup Experimental Procedures                                 | S2     |
| <sup>1</sup> H and <sup>13</sup> C NMR Spectra of All Compounds | S3-S20 |

### **The procedure for determining the acid exchange capacity of PANF-PA.**

The dried PANF-PA (0.100 g) was immersed into 20 mL of 0.100 M HCl for 6 h at room temperature. The treated fiber was then filtered out. The HCl concentration of the remaining solution was determined by titration with 0.100 M NaOH. The exchange capacity was calculated based on the amount of acid consumed. Parallel titration for three times and the acid exchange capacity of PANF-EA was 4.02 mmol·g<sup>-1</sup>.

### **Scaleup experimental procedures**

**Scaleup procedure for the synthesis of iminocoumarin.** A mixture of salicylaldehyde (40 mmol, 4.89 g), activated nitrile (40 mmol, 6.49 g), and PANF-PA (0.5 g, 5% mol based on acid exchange capacity) in water-EtOH mixtures (200 mL, 40: 160 v/v) was stirred under refluxing for 1.0 h. The work-up procedure as shown in the general procedure, and 10.21 g product was obtained, with the isolated yield of 96%.

**Scaleup procedure for the synthesis of sulfone.** A mixture of benzyl bromide (40 mmol, 6.84 g), *p*-toluenesulfinic acid sodium salt (50 mmol, 8.91 g), and PANF-PA (0.5 g, 5% mol based on acid exchange capacity) in water (100 mL) was stirred under 90 °C for 0.5 h. The work-up procedure as shown in the general procedure, and the recovered PANF-PA was used again. Finally, 8.68 g and 9.57 g product was obtained respectively, with the isolated yield of 88% and 97%.

## <sup>1</sup>H and <sup>13</sup>C NMR Spectra of All Compounds

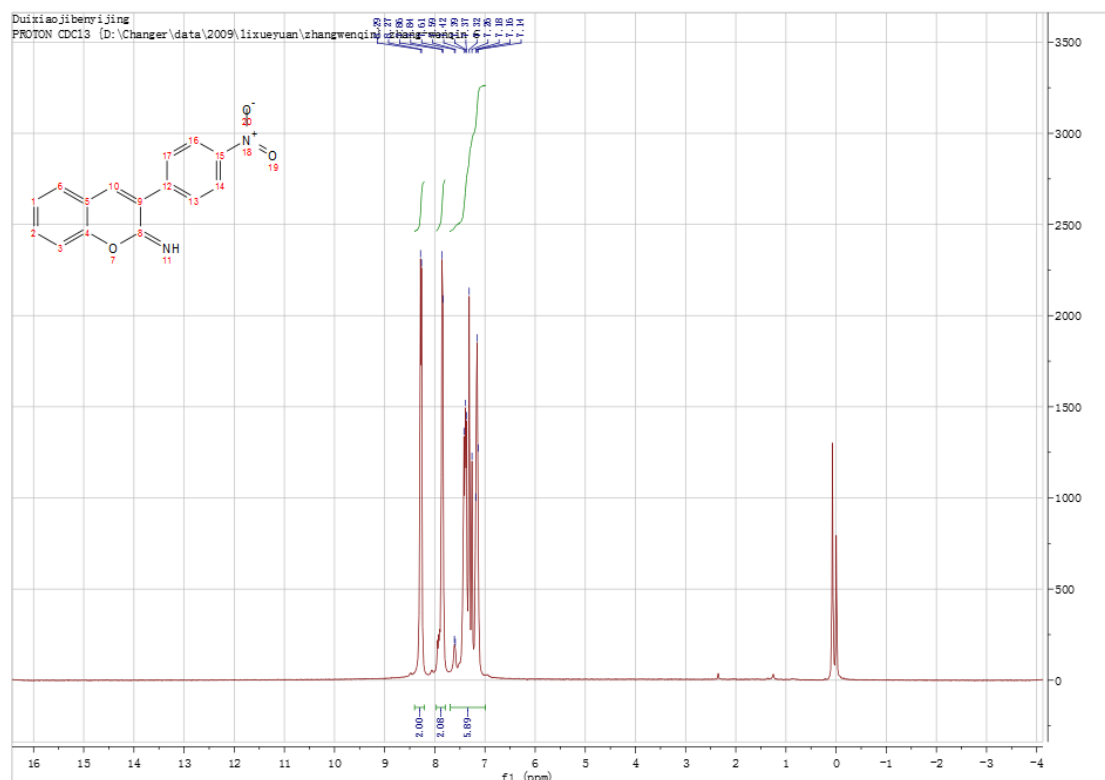

The <sup>1</sup>H NMR spectrum of 3-(4-Nitrophenyl)iminocoumarin (1a).

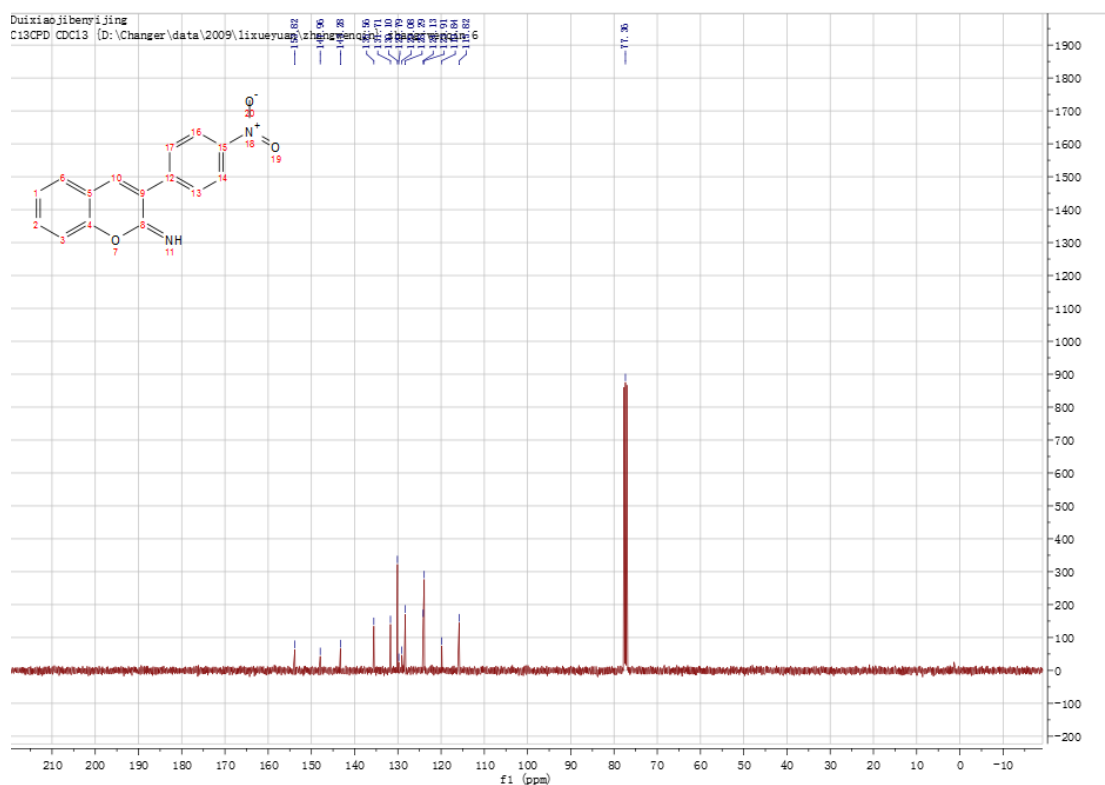

The <sup>13</sup>C NMR spectrum of 3-(4-Nitrophenyl)iminocoumarin (1a).

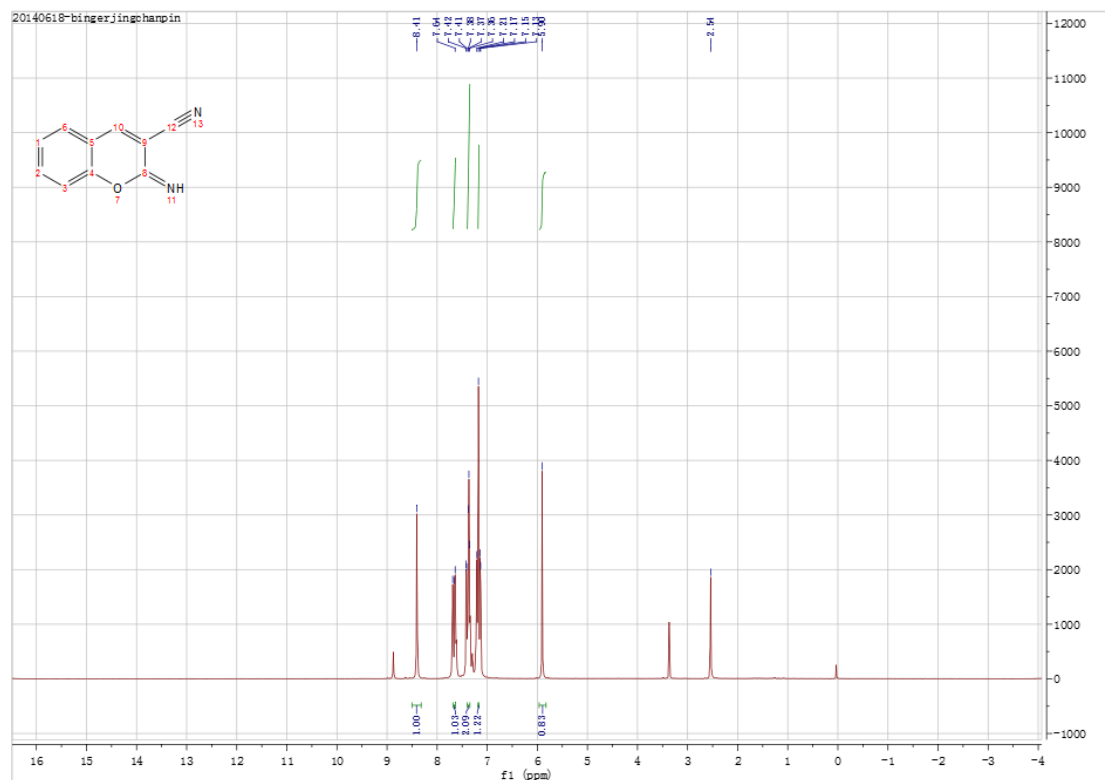

The  $^1\text{H}$  NMR spectrum of 3-Cyaniminocoumarin (1b).

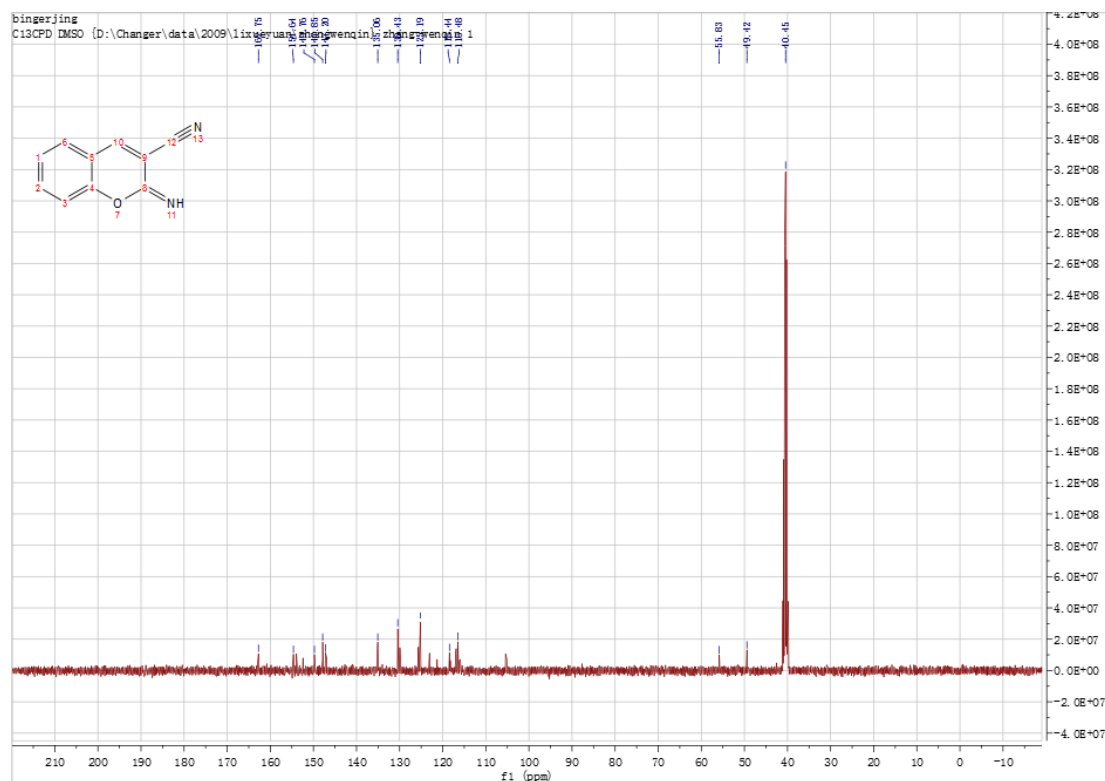

The  $^{13}\text{C}$  NMR spectrum of 3-Cyaniminocoumarin (1b).

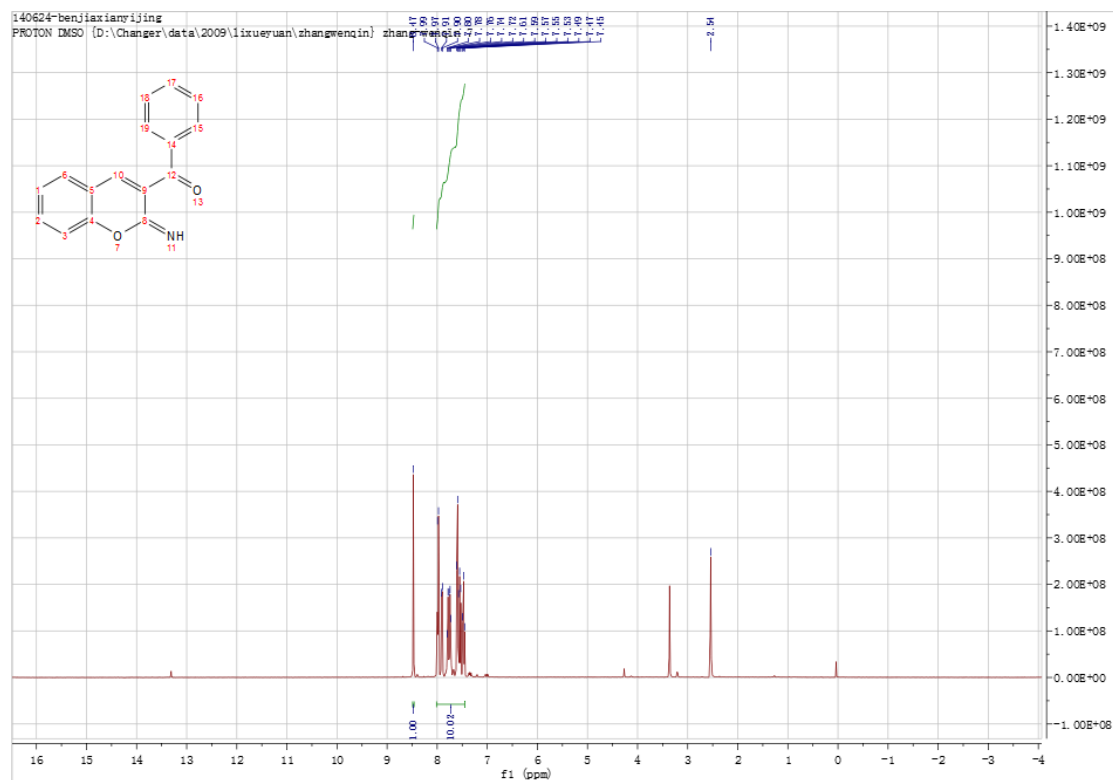

The  $^1\text{H}$  NMR spectrum of 3-Benzoyliminocoumarin (1c).

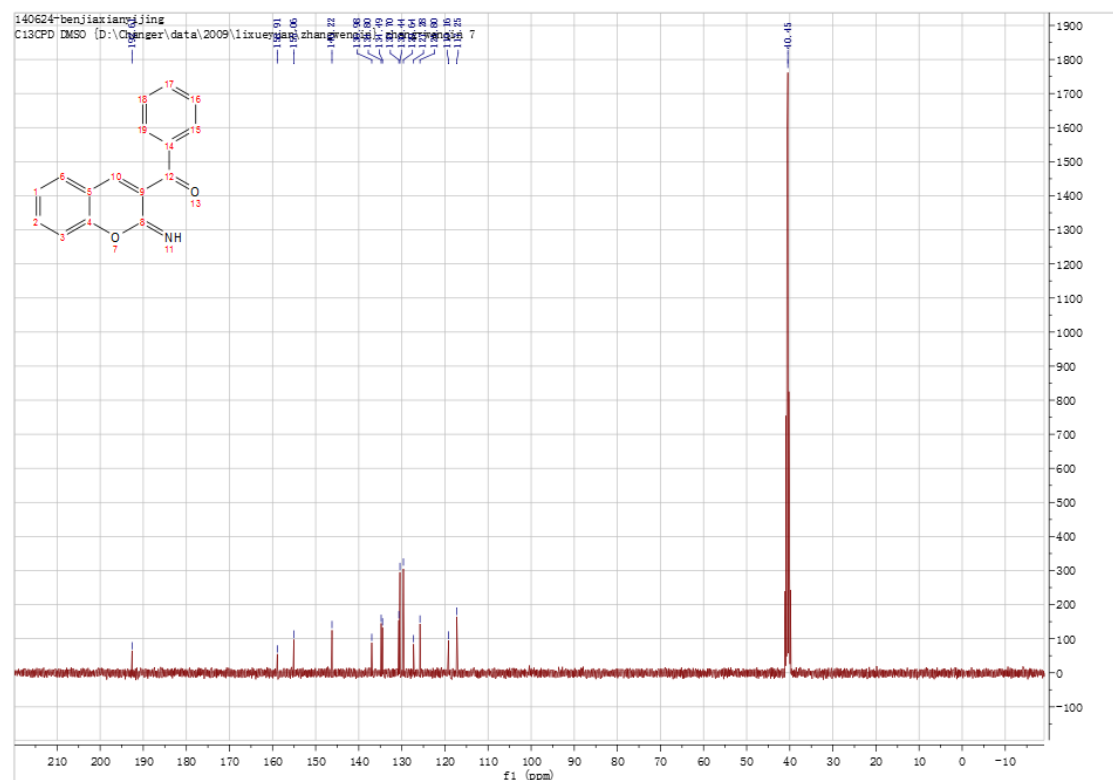

The  $^{13}\text{C}$  NMR spectrum of 3-Benzoyliminocoumarin (1c).

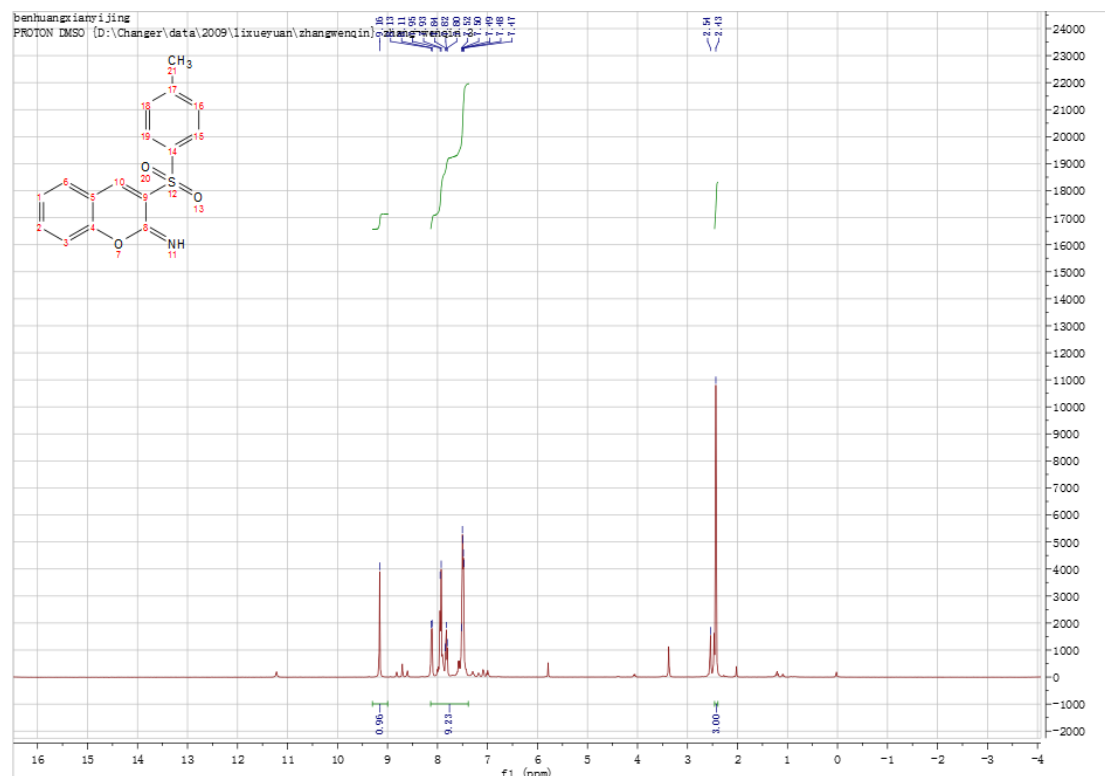

The <sup>1</sup>H NMR spectrum of 3-(4-Tolylsulfonyl)iminocoumarin (1d).

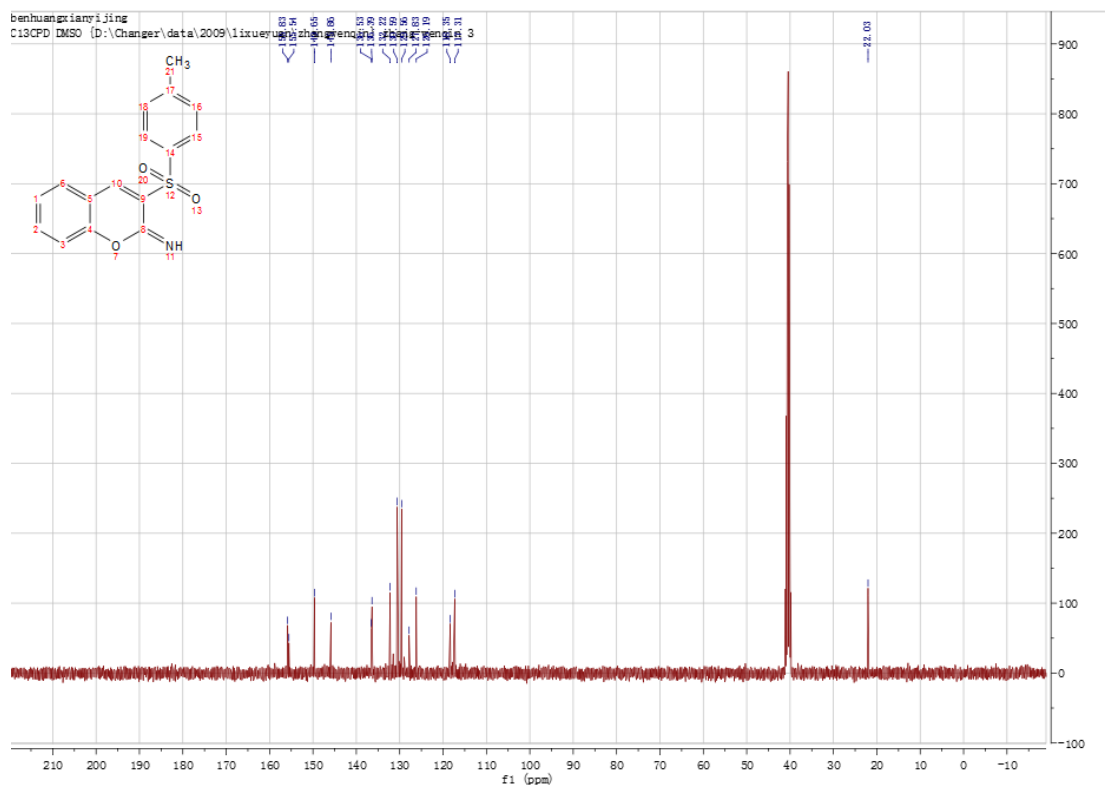

The <sup>13</sup>C NMR spectrum of 3-(4-Tolylsulfonyl)iminocoumarin (1d).

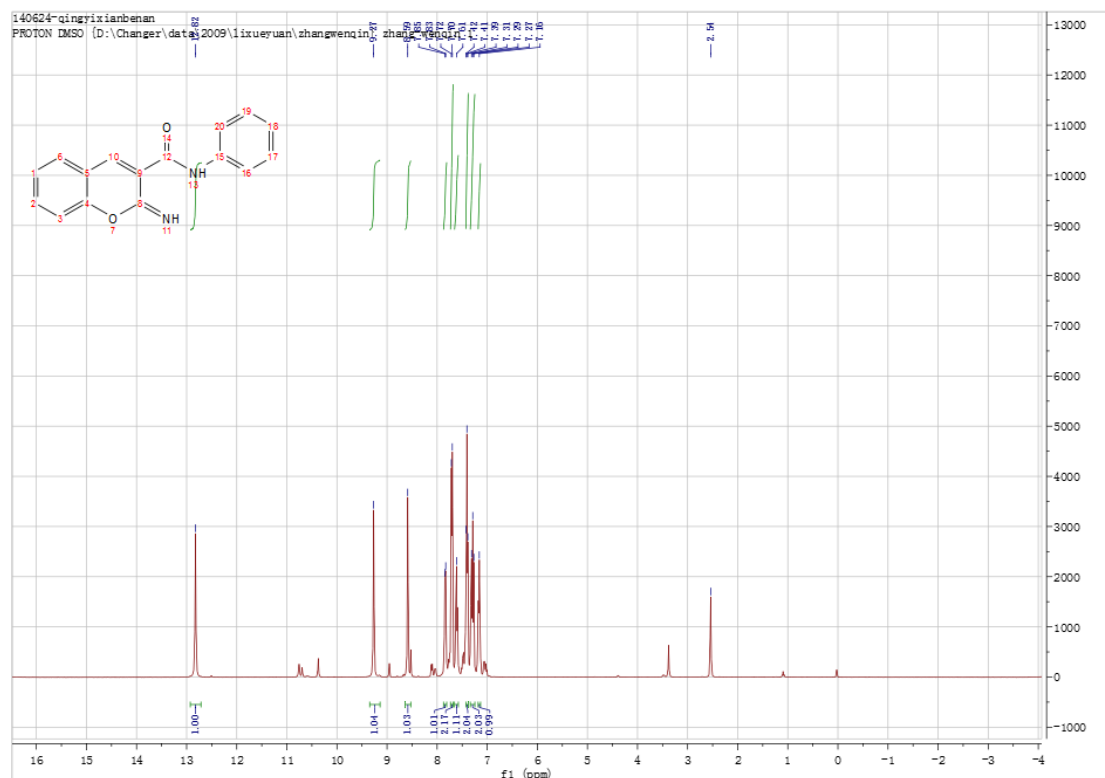

The  $^1\text{H}$  NMR spectrum of 3-(*N*-Phenylcarboxamide)iminocoumarin (1e).

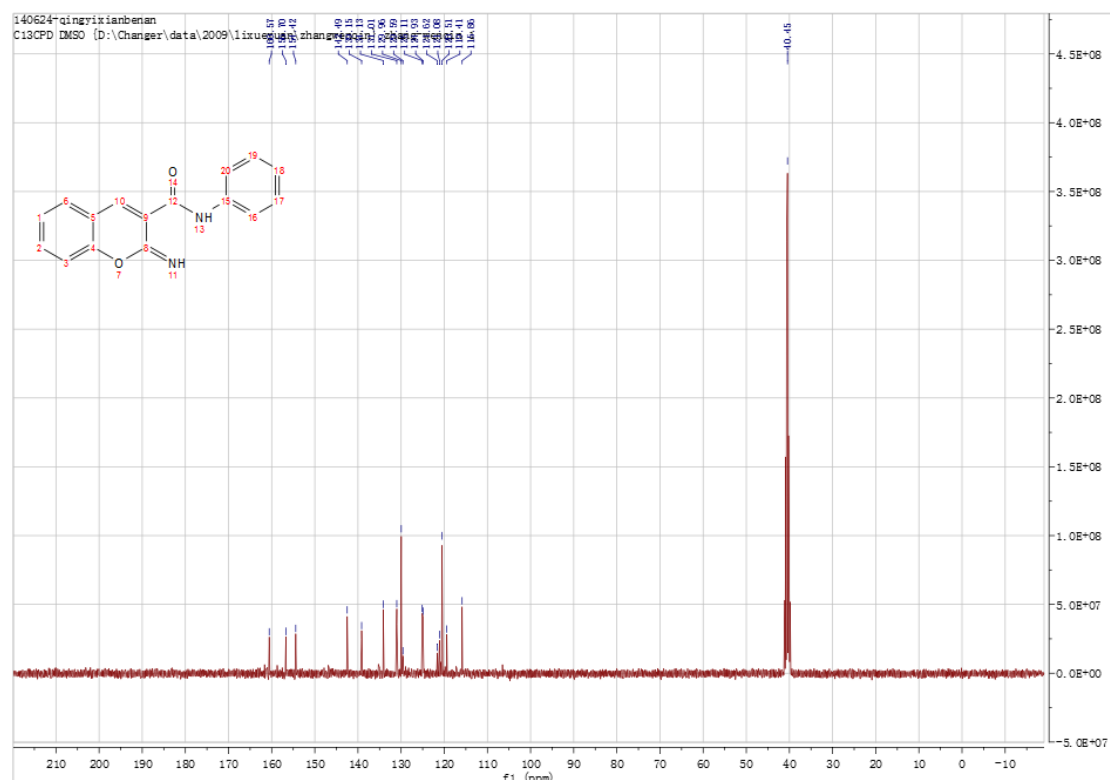

The  $^{13}\text{C}$  NMR spectrum of 3-(*N*-Phenylcarboxamide)iminocoumarin (1e).





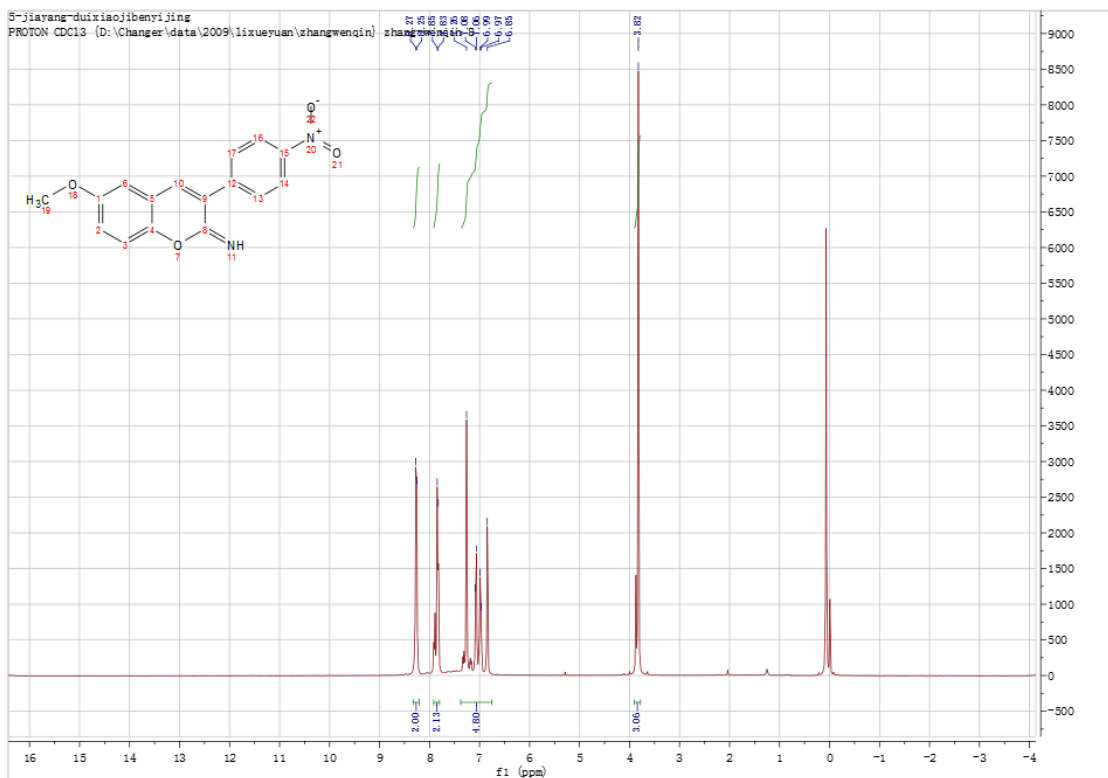

The  $^1\text{H}$  NMR spectrum of 6-Methoxy-3-(4-nitrophenyl)iminocoumarin (1g).

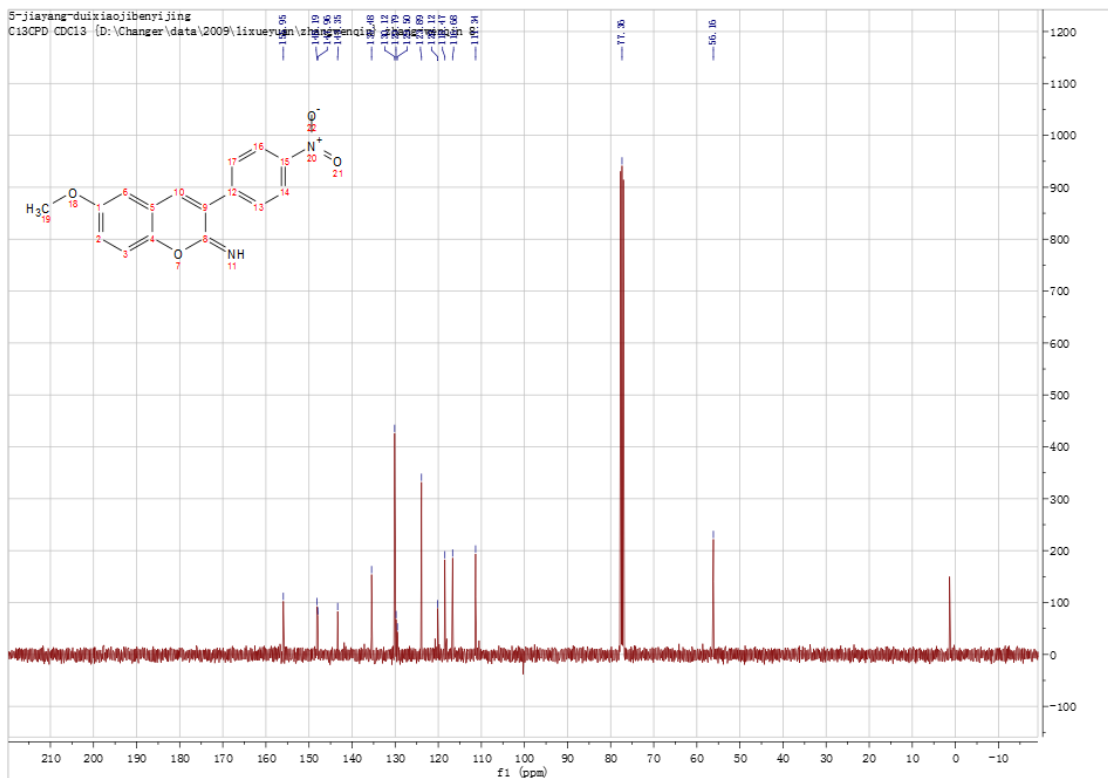

The  $^{13}\text{C}$  NMR spectrum of 6-Methoxy-3-(4-nitrophenyl)iminocoumarin (1g).

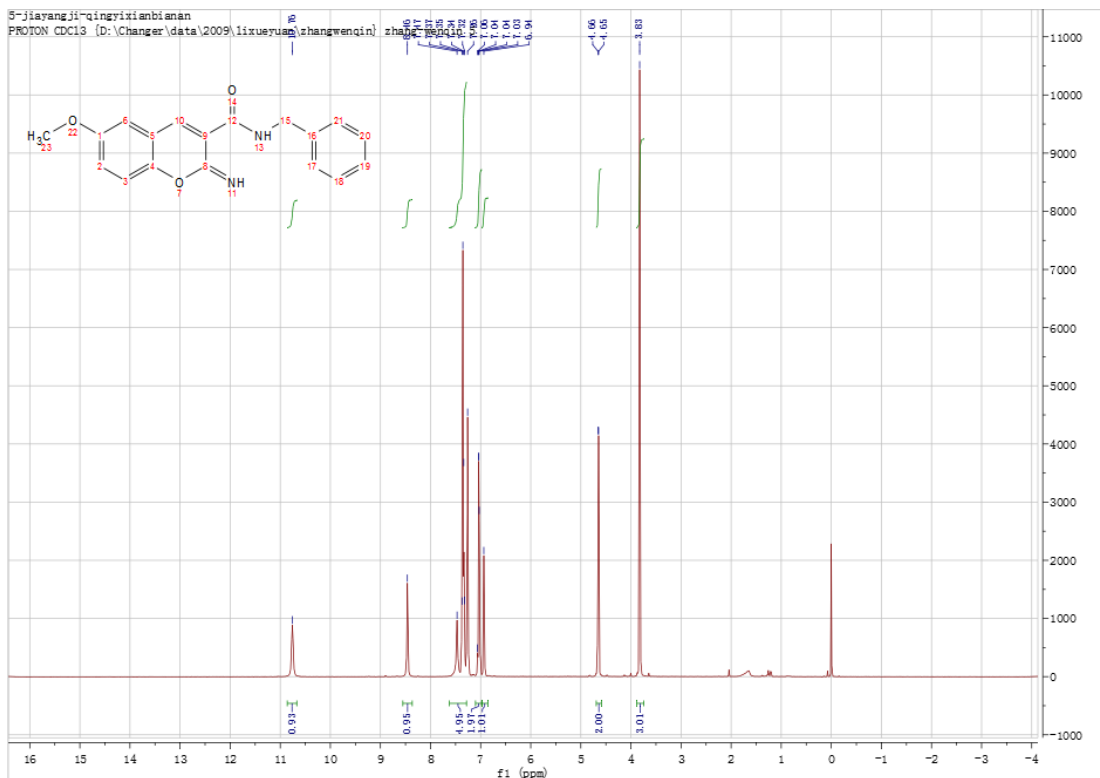

The  $^1\text{H}$  NMR spectrum of 3-(N-Benzylcarboxamide)-6-methoxyiminocoumarin (1h).

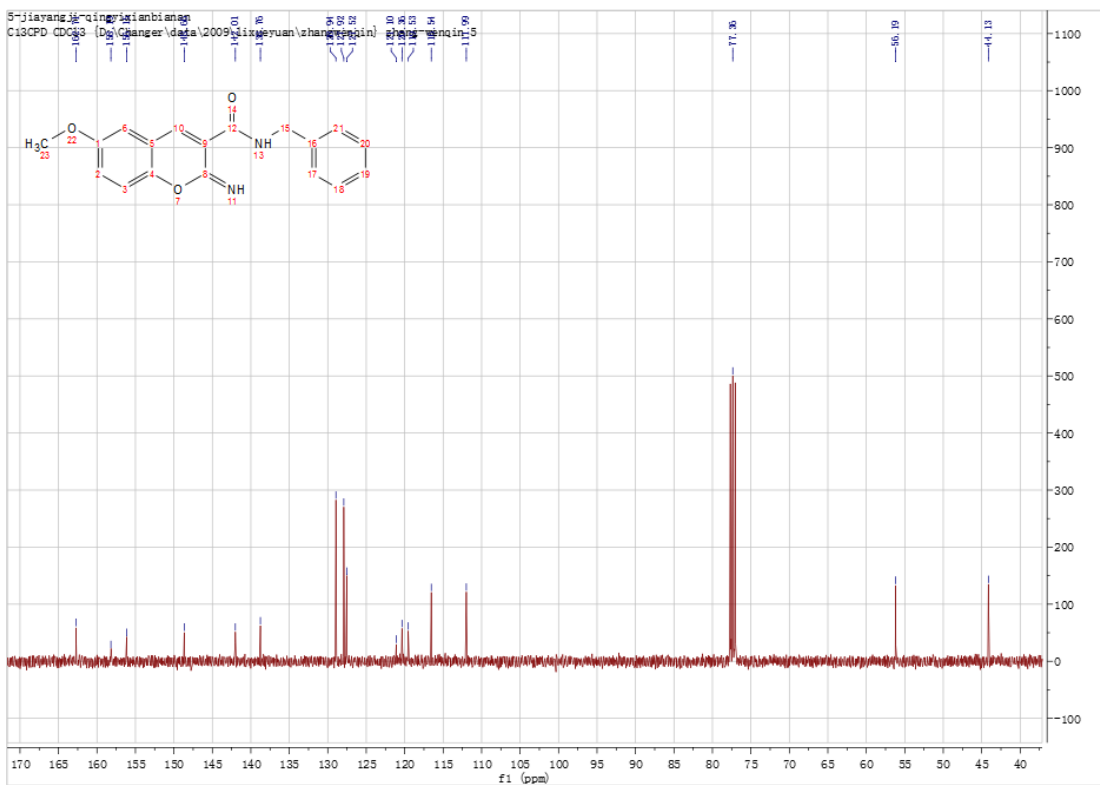

The  $^{13}\text{C}$  NMR spectrum of 3-(N-Benzylcarboxamide)-6-methoxyiminocoumarin (1h).

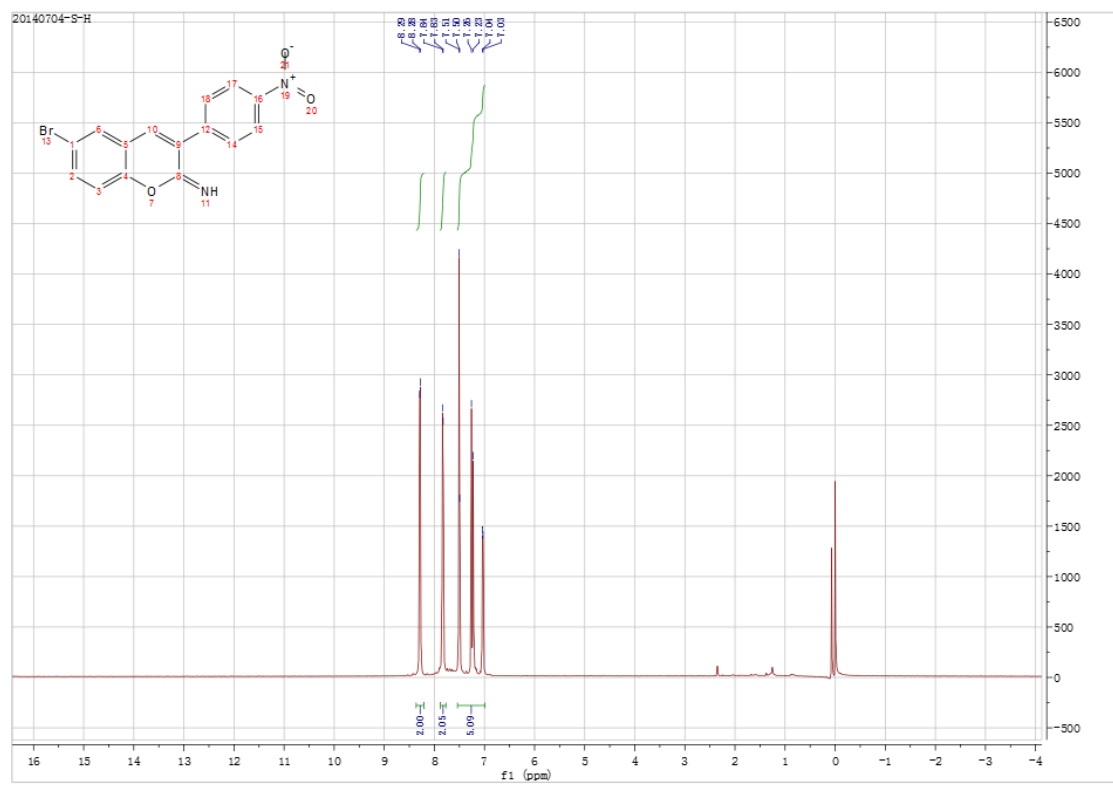

The <sup>1</sup>H NMR spectrum of 6-Bromo-3-(4-nitrophenyl)iminocoumarin (1i).

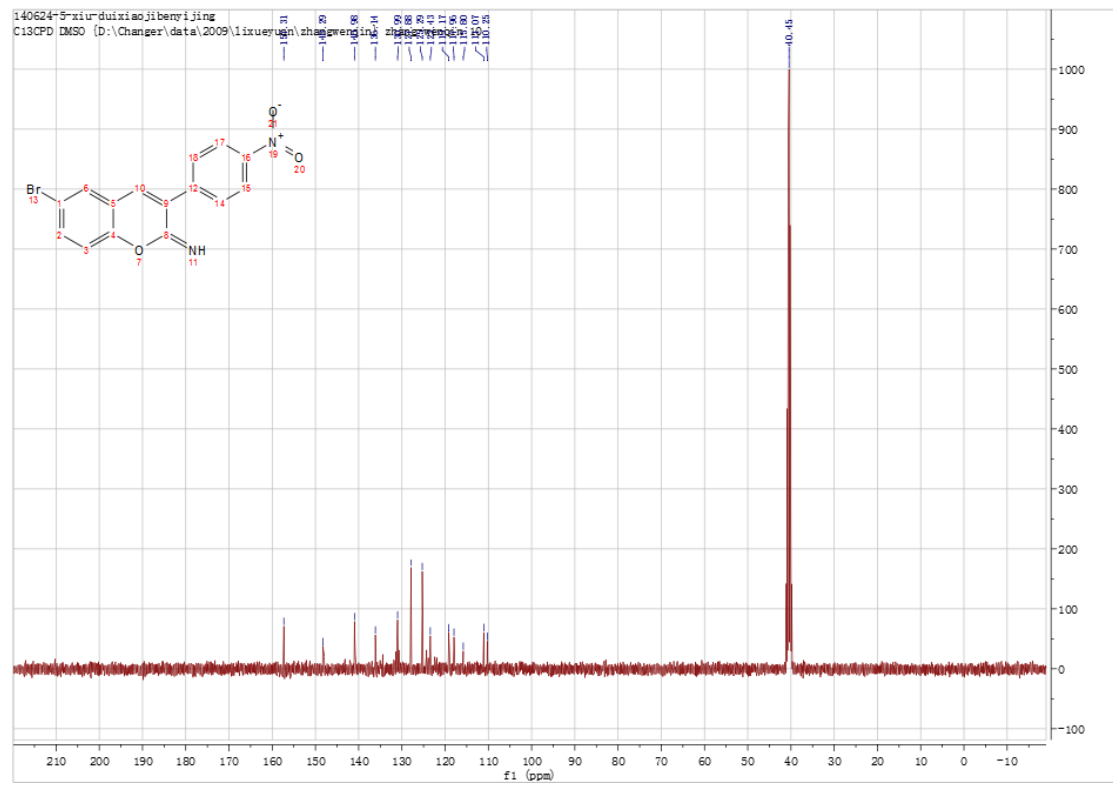

The <sup>13</sup>C NMR spectrum of 6-Bromo-3-(4-nitrophenyl)iminocoumarin (1i).

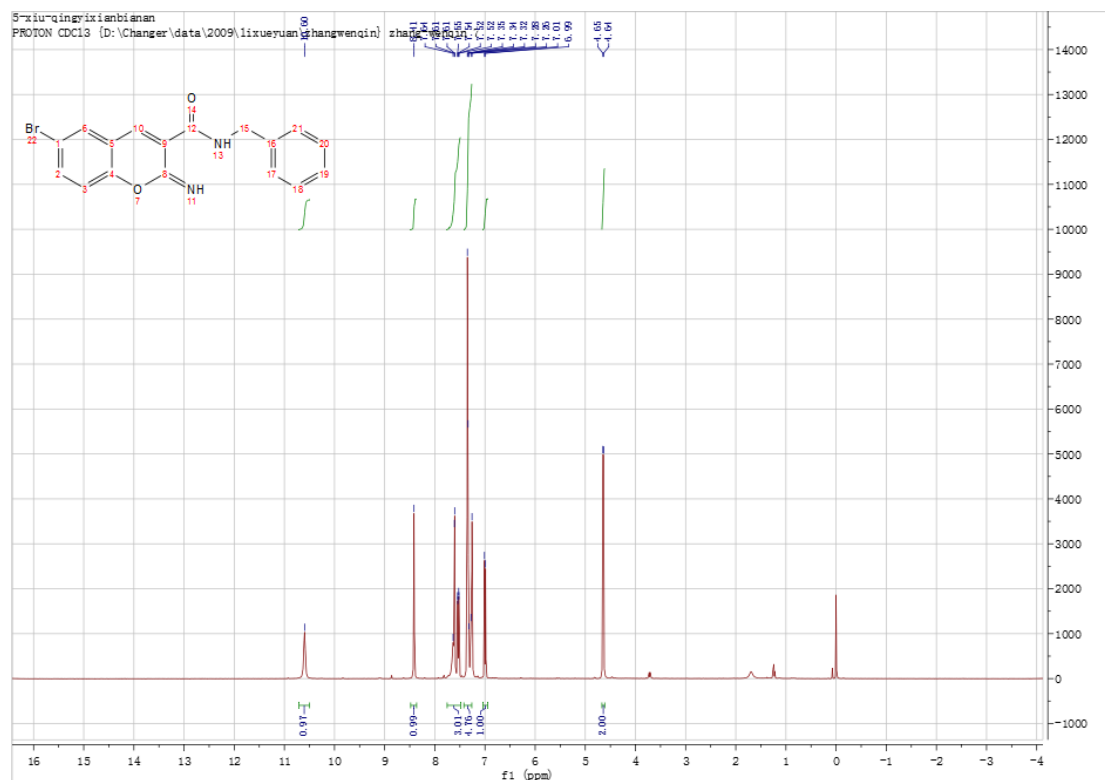

The <sup>1</sup>H NMR spectrum of 3-(*N*-Benzylcarboxamide)-6-bromoiminocoumarin (1j).

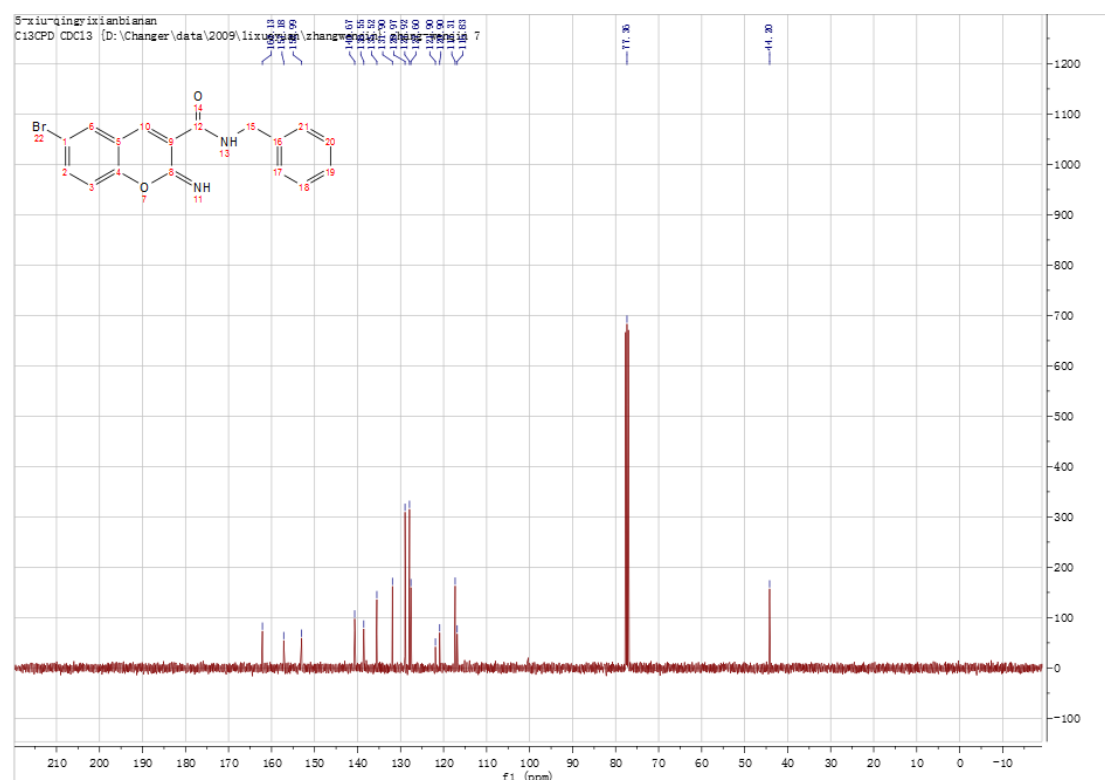

The <sup>13</sup>C NMR spectrum of 3-(*N*-Benzylcarboxamide)-6-bromoiminocoumarin (1j).

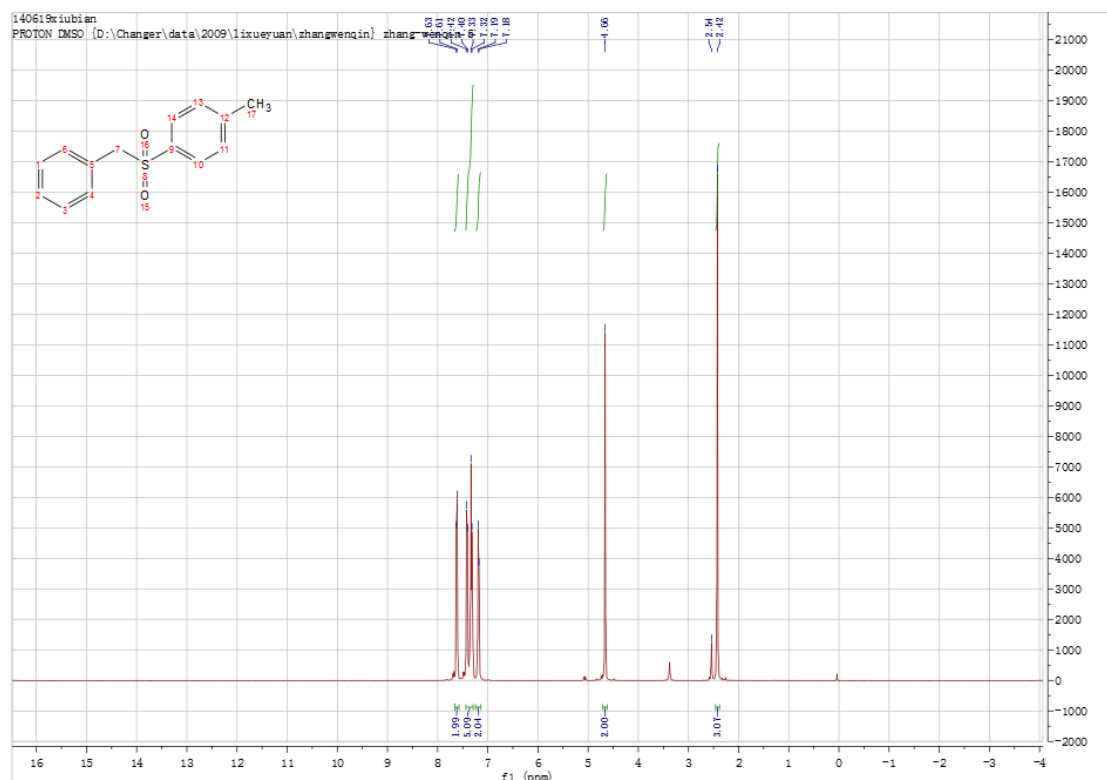

The  $^1\text{H}$  NMR spectrum of 1-(Benzyloxymethyl)-4-methylbenzene (2a).

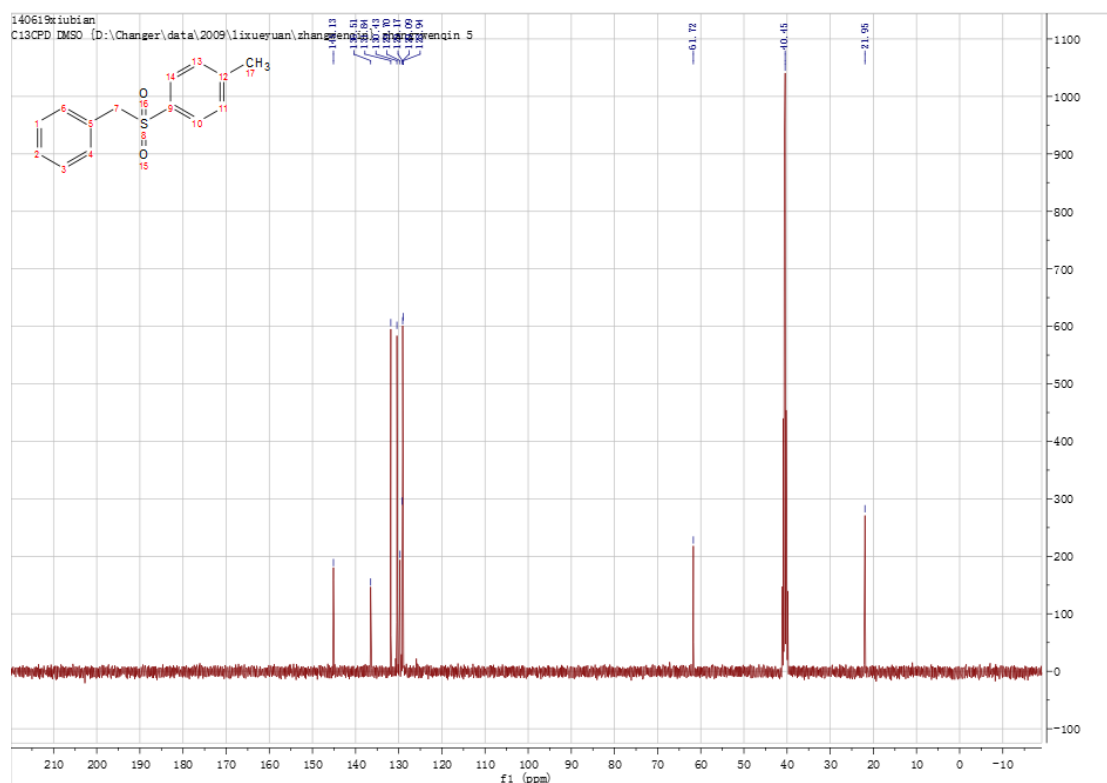

The  $^{13}\text{C}$  NMR spectrum of 1-(Benzyloxymethyl)-4-methylbenzene (2a).

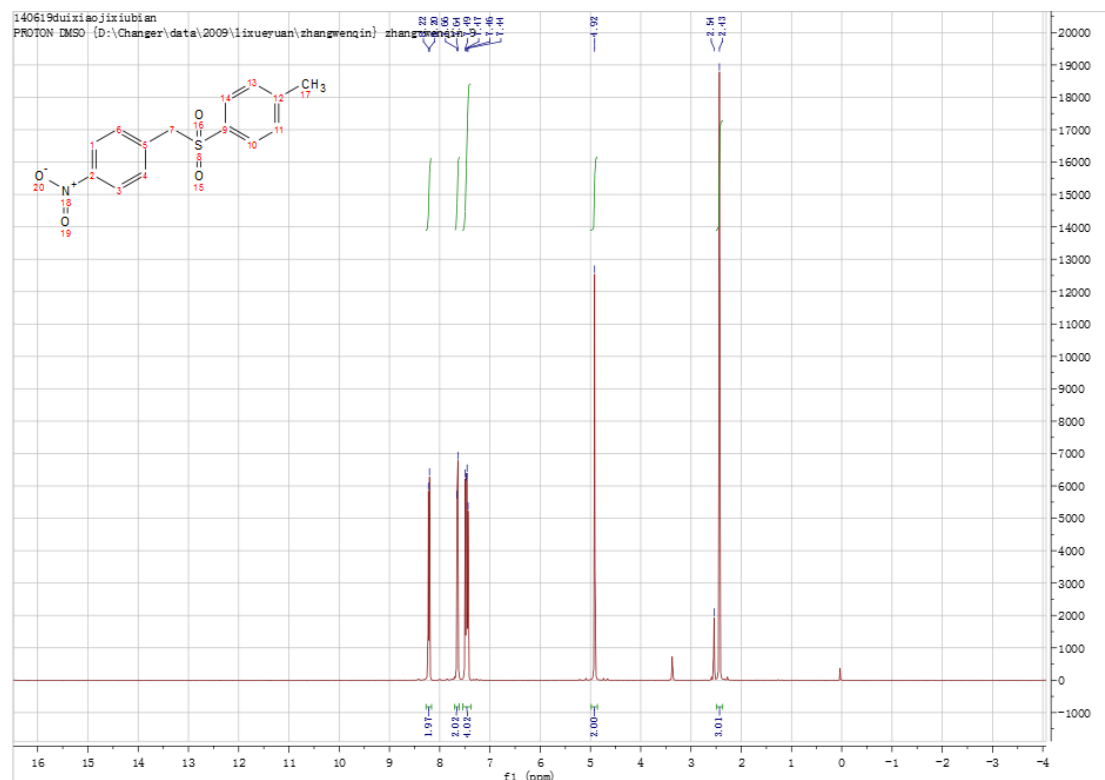

The  $^1\text{H}$  NMR spectrum of 1-Nitro-4-(4-tolylsulfonylmethyl)benzene (2b).

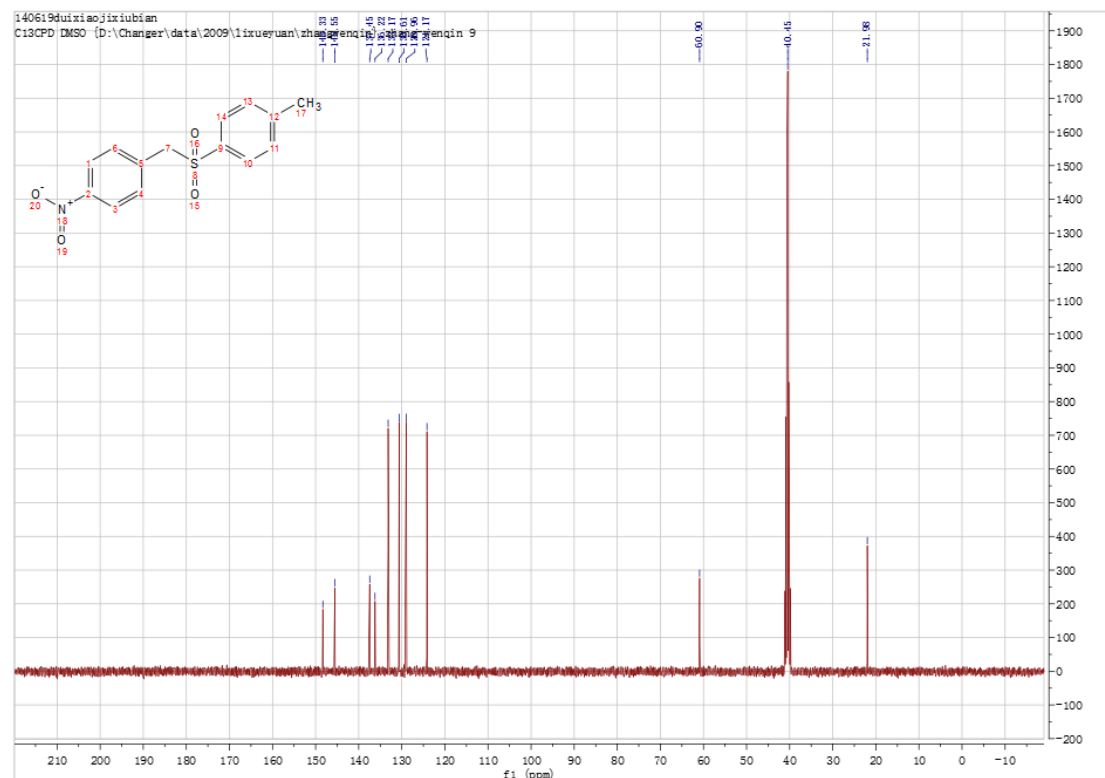

The  $^{13}\text{C}$  NMR spectrum of 1-Nitro-4-(4-tolylsulfonylmethyl)benzene (2b).

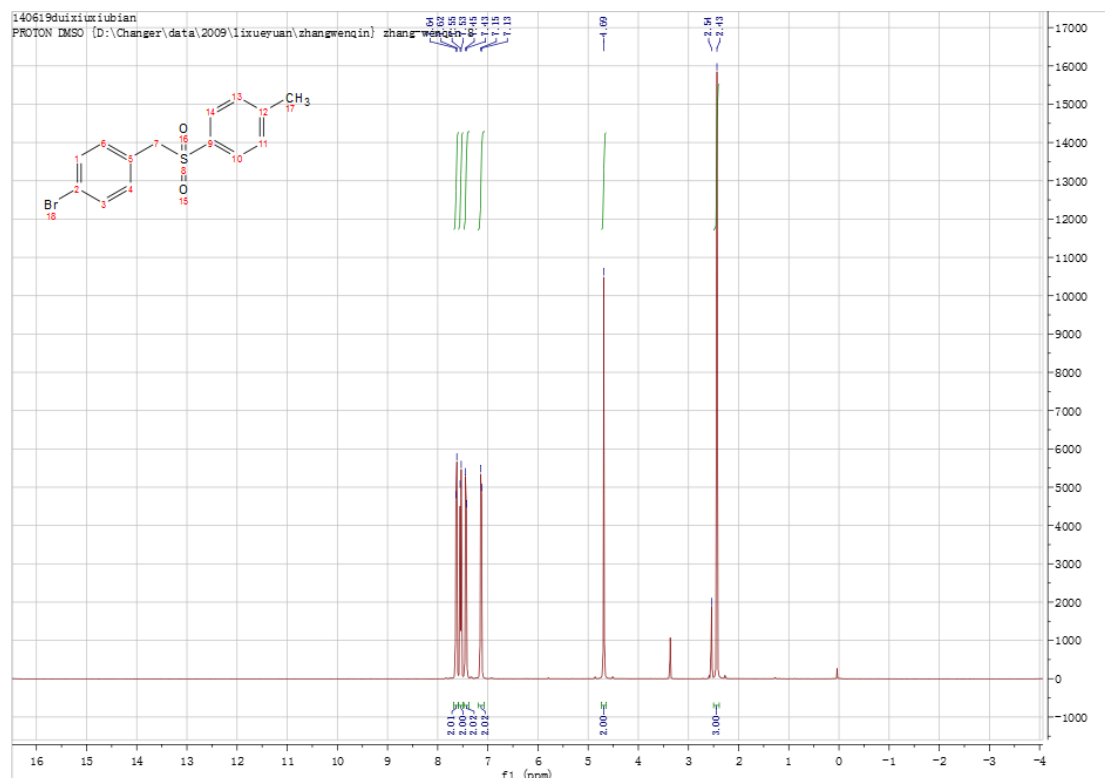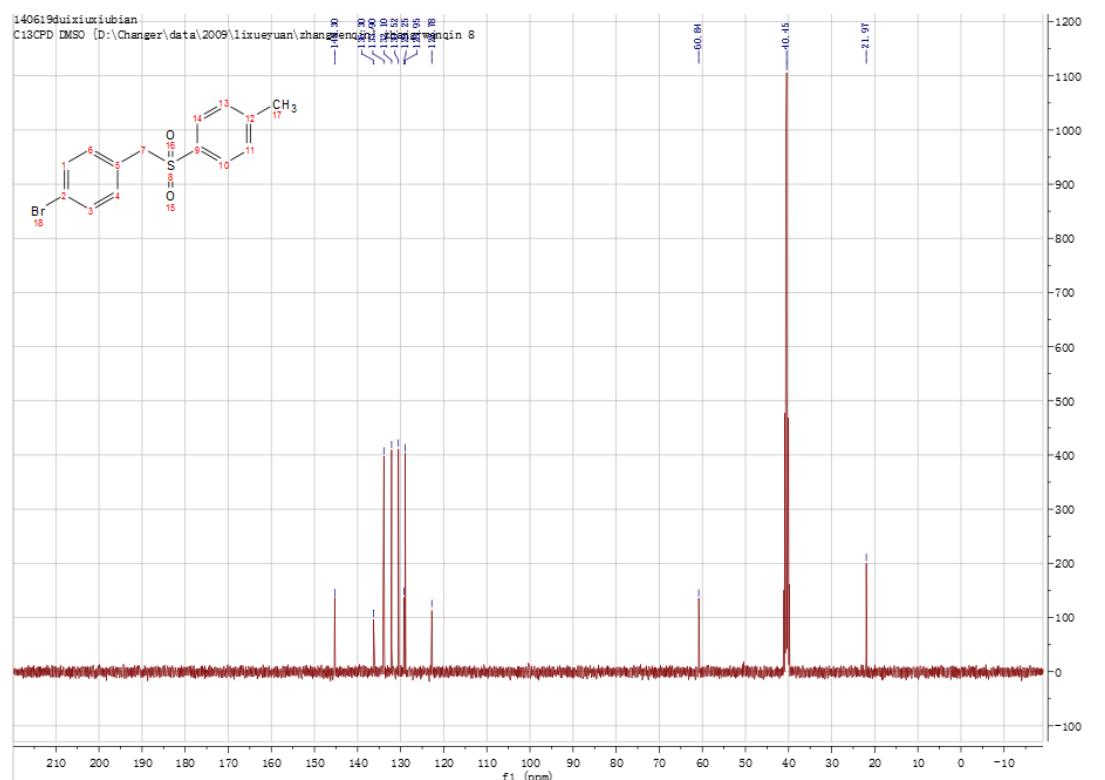

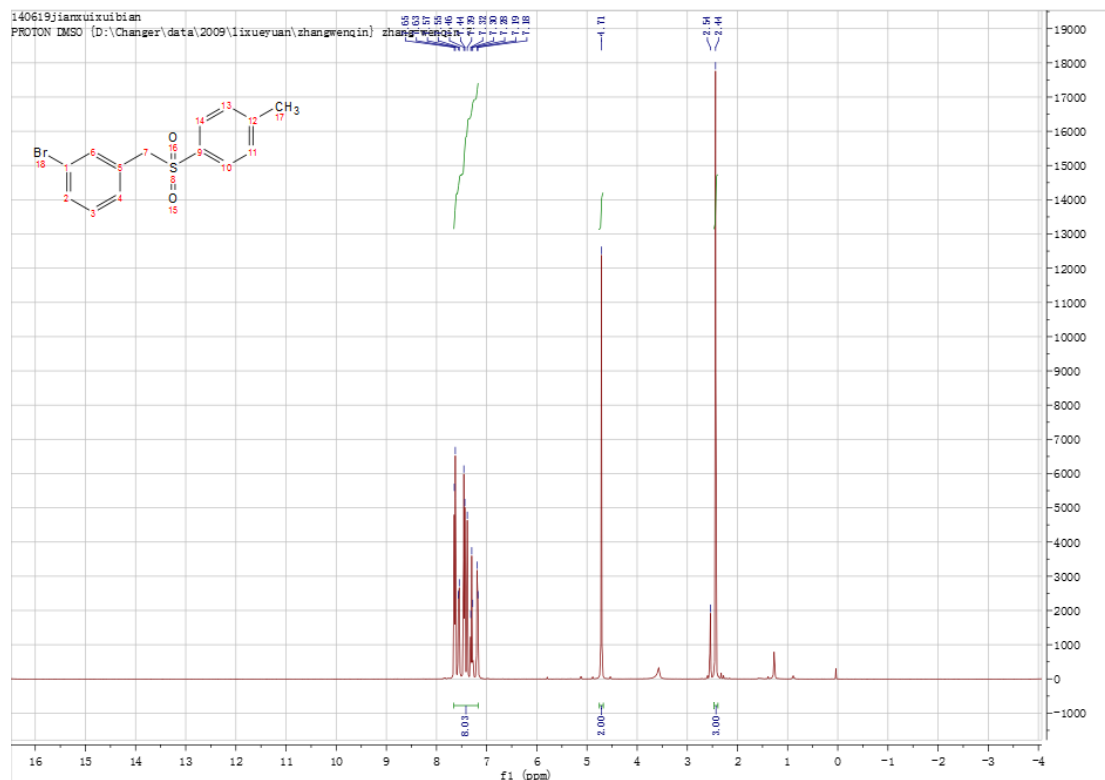

The  $^1\text{H}$  NMR spectrum of 1-Bromo-3-(4-tolylsulfonylmethyl)benzene (2d).

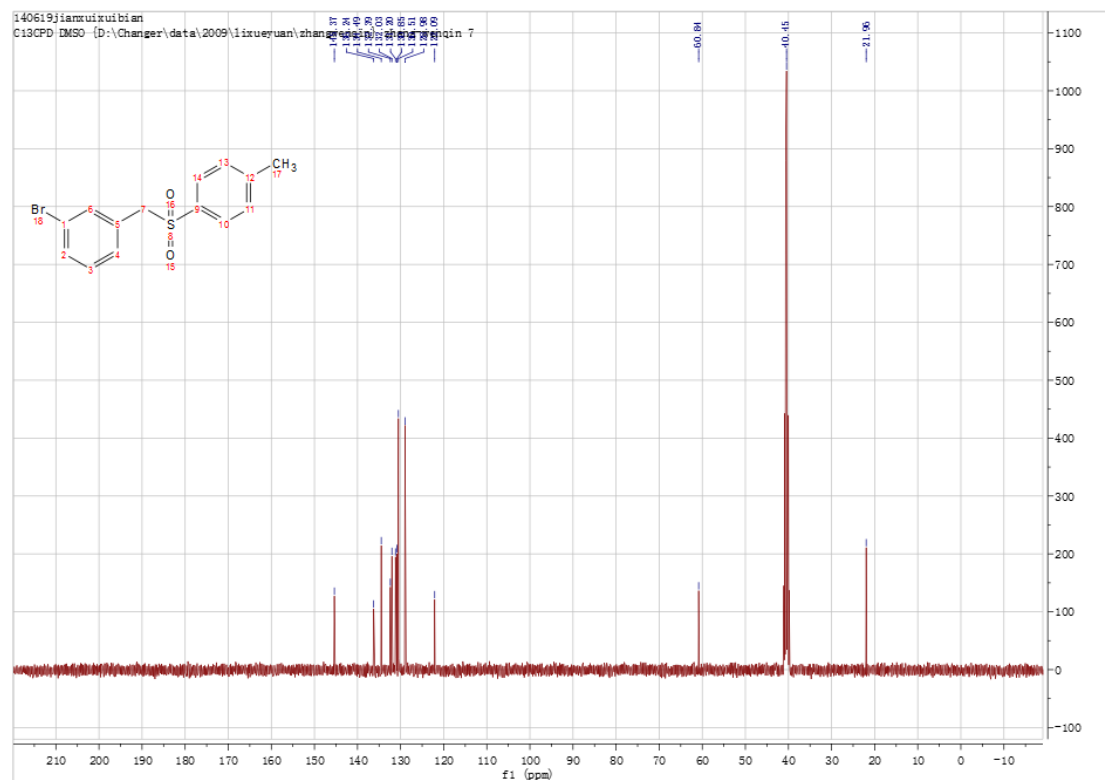

The  $^{13}\text{C}$  NMR spectrum of 1-Bromo-3-(4-tolylsulfonylmethyl)benzene (2d).



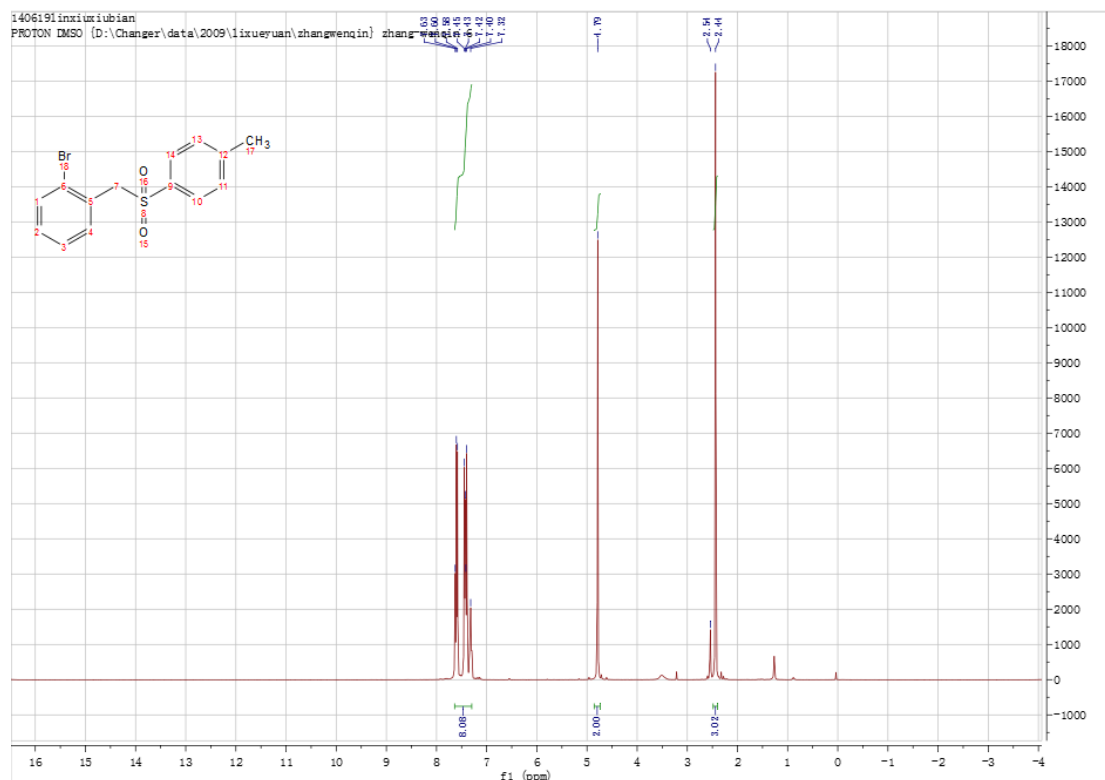

The  $^1\text{H}$  NMR spectrum of 1-Bromo-2-(4-tolylsulfonylmethyl)benzene (2e).

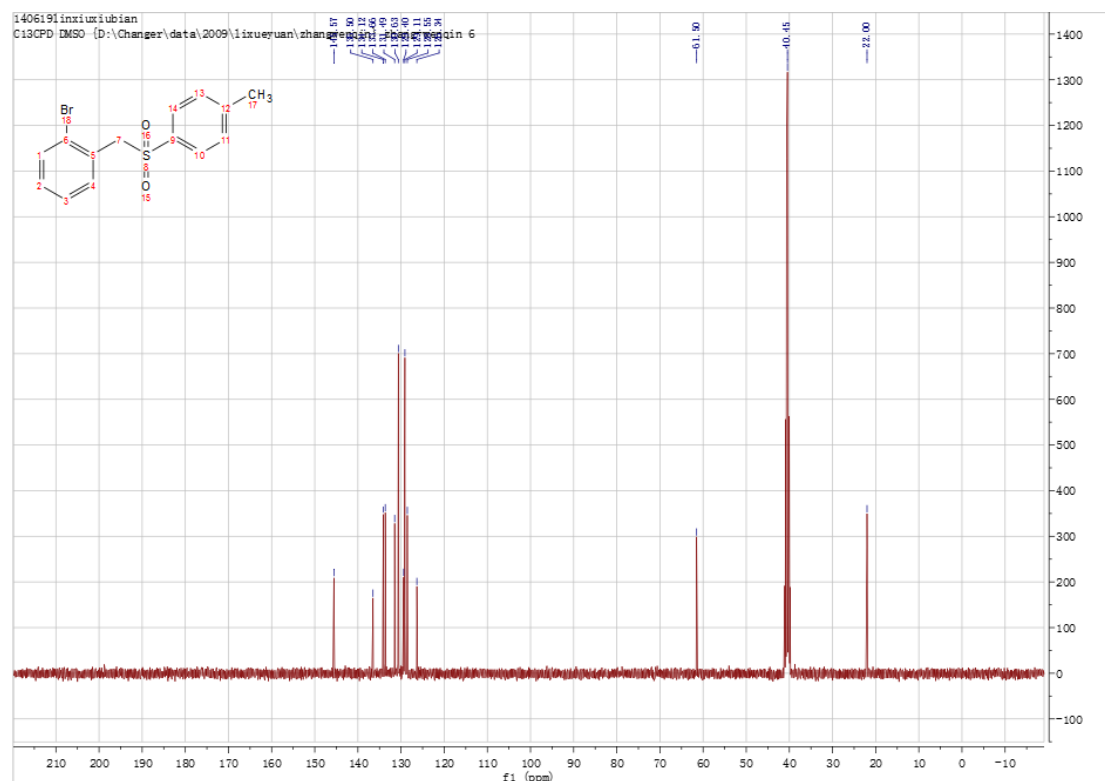

The  $^{13}\text{C}$  NMR spectrum of 1-Bromo-2-(4-tolylsulfonylmethyl)benzene (2e).

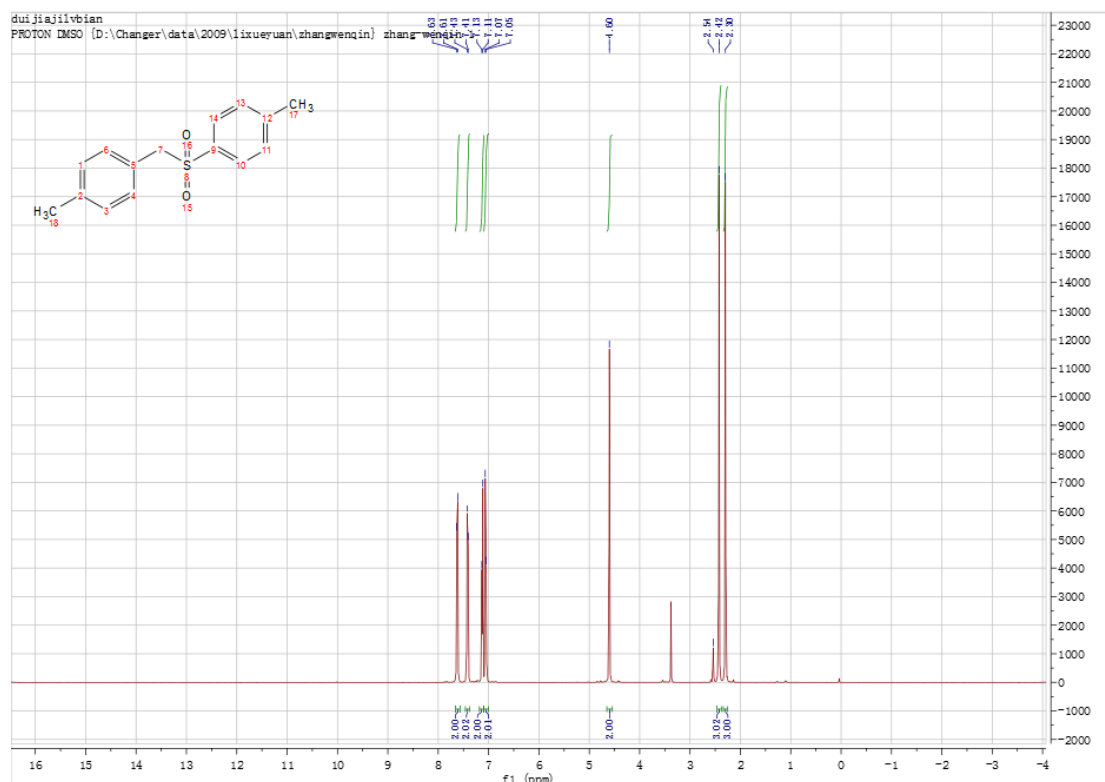

The  $^1\text{H}$  NMR spectrum of 1-Methyl-4-(4-tolylsulfonylmethyl)benzene (2f).

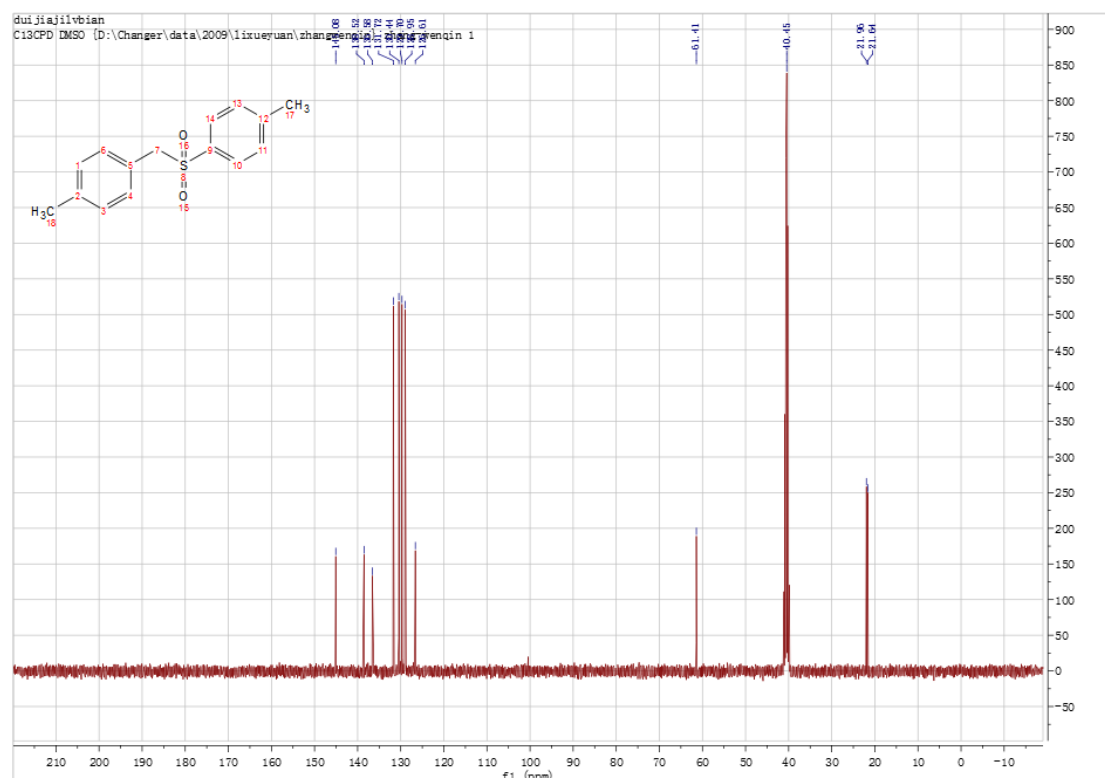

The  $^{13}\text{C}$  NMR spectrum of 1-Methyl-4-(4-tolylsulfonylmethyl)benzene (2f).

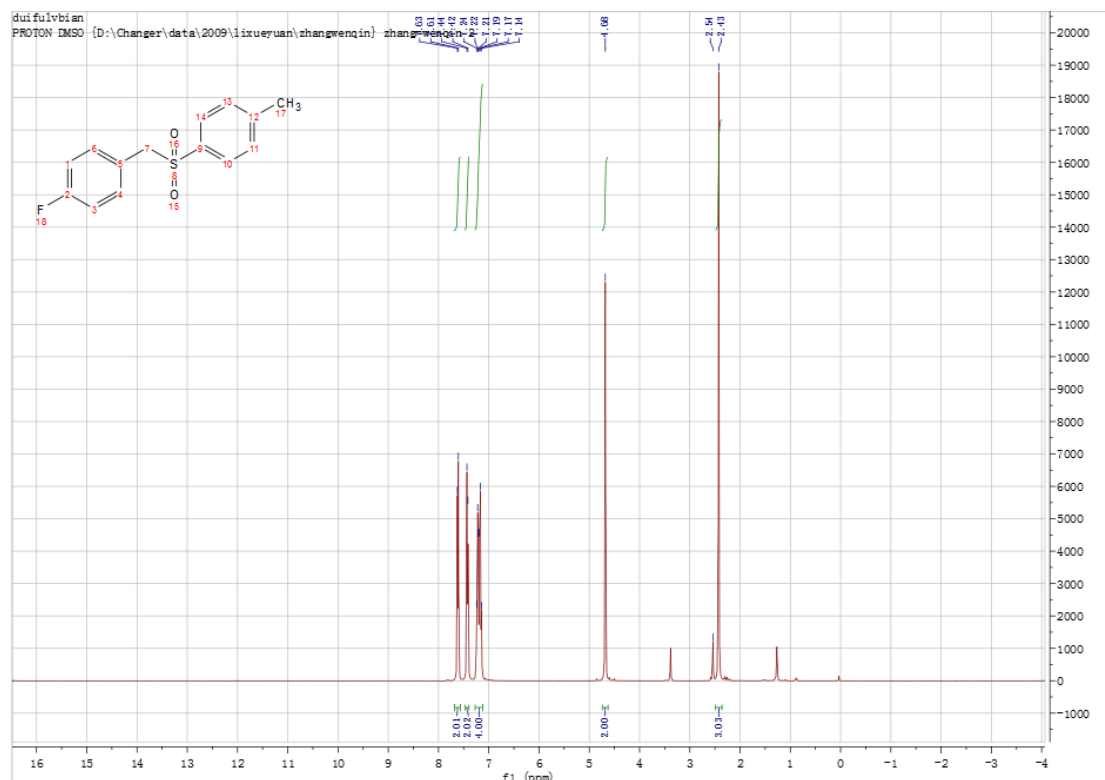

The  $^1\text{H}$  NMR spectrum of 1-Fluoro-4-(4-tolylsulfonylmethyl)benzene (2g).

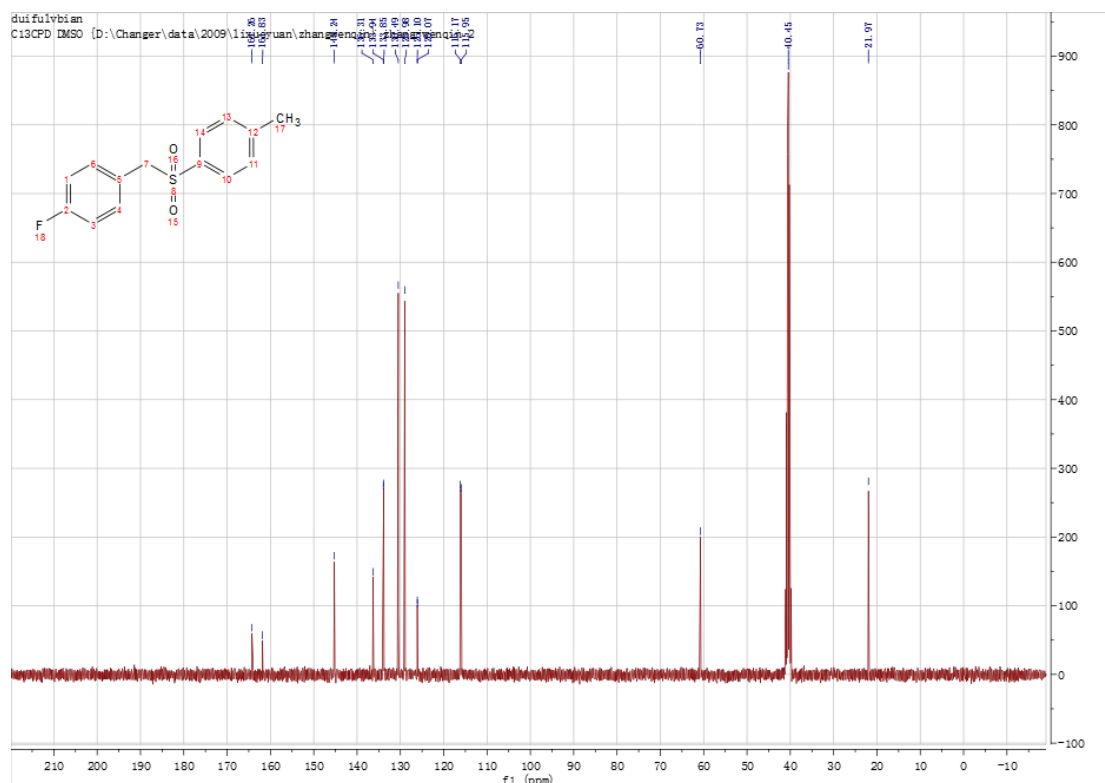

The  $^{13}\text{C}$  NMR spectrum of 1-Fluoro-4-(4-tolylsulfonylmethyl)benzene (2g).

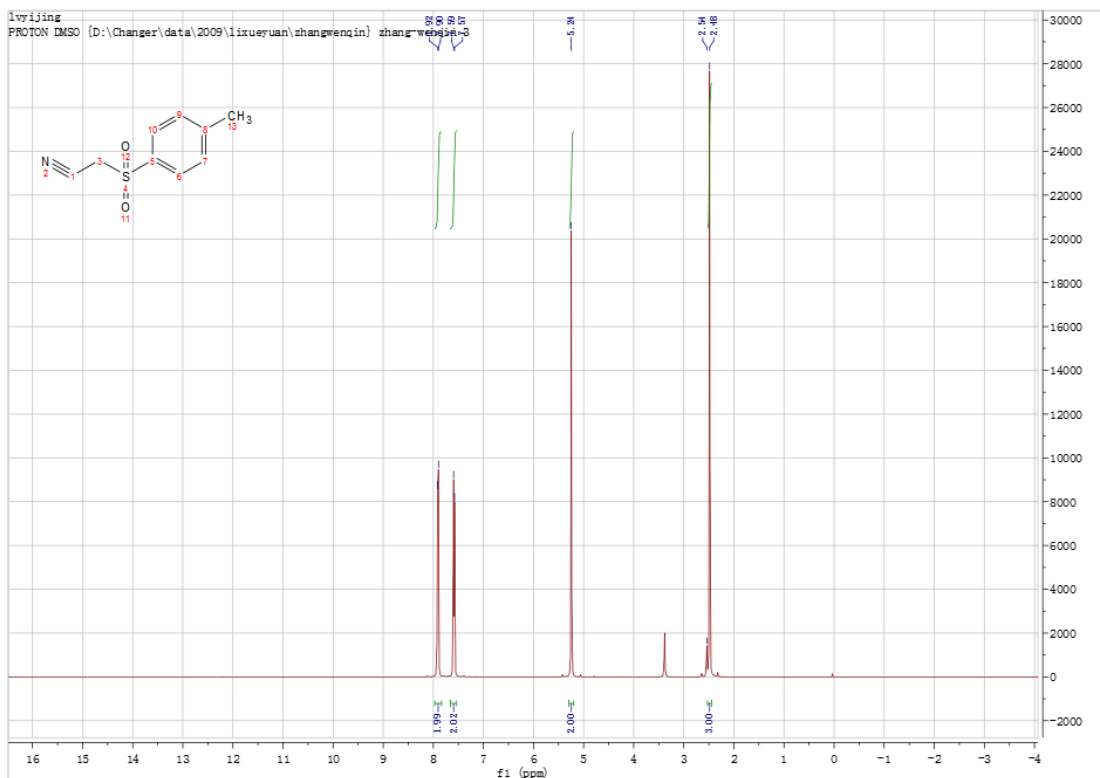

The  $^1\text{H}$  NMR spectrum of 4-Tosylacetonitrile (2h).

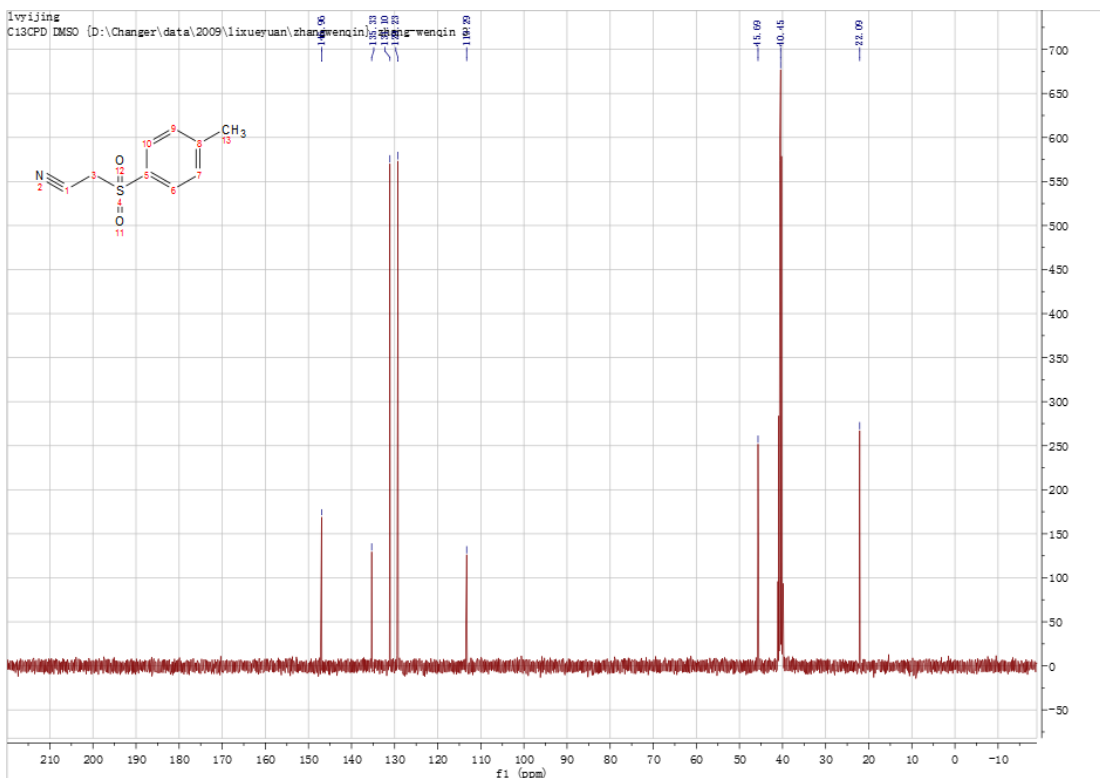

The  $^{13}\text{C}$  NMR spectrum of 4-Tosylacetonitrile (2h).
